1     **Chikungunya virus infection impairs osteogenic differentiation of bone marrow-**  
2                                     **derived mesenchymal stem cells**

3     Enakshi Roy<sup>1</sup>, Wen Shi<sup>2</sup>, Bin Duan<sup>2\*</sup>, St Patrick Reid<sup>1\*</sup>

4

5

6

7     <sup>1</sup>Department of Pathology & Microbiology, University of Nebraska Medical Center,  
8     Omaha, NE 68198-5900, USA

9     <sup>2</sup>Mary & Dick Holland Regenerative Medicine Program, Division of Cardiology, Department  
10    of Internal Medicine, University of Nebraska Medical Center, Omaha, NE 68198-5900, USA

11

12    \*Corresponding authors- St Patrick Reid, [patrick.reid@unmc.edu](mailto:patrick.reid@unmc.edu); Bin Duan,  
13    [bin.duan@unmc.edu](mailto:bin.duan@unmc.edu)

14

15

16

17

18

19

## 20 **Abstract**

21 Chikungunya virus (CHIKV) is a positive-sense, single-stranded RNA virus,  
22 belonging to the genus alphavirus in the family *Togaviridae*. The virus is spread by the  
23 *Aedes* species (sp.) mosquitoes in tropical and subtropical regions of the world. CHIKV  
24 causes Chikungunya fever (CHIKF), where the acute stage of infection is characterized  
25 by high fever, headache, rash, and polyarthralgia. In 30-40% of cases, patients  
26 develop a chronic stage with debilitating joint pain persisting for months to years  
27 imposing a burden on the population in terms of disability adjusted life years  
28 (DALY). Presently, no vaccines or treatment options are available for this infection. Prior  
29 investigations reveal that CHIKV infection is associated with bone pathology; however,  
30 the molecular mechanism underlying CHIKV-induced bone pathology remains poorly  
31 defined. Studies show that disruption of osteogenic differentiation and function of bone  
32 marrow-derived mesenchymal stem cells (BMMSCs) can lead to bone pathologies.  
33 However, to date pathogenesis of CHIKV infection in this context has not been  
34 studied. In the current study, we investigated the susceptibility of BMMSCs to CHIKV  
35 and studied the effect of infection on BMMSCs-derived osteogenic cells. To our  
36 knowledge, for the first time we report that CHIKV can productively infect BMMSCs. We  
37 observed a decrease in the intracellular and extracellular alkaline phosphatase (ALP)  
38 activity and reduction in calcium phosphate deposition in infected cells compared to  
39 mock-infected control. Thus, we conclude that CHIKV infects BMMSCs and disrupts  
40 function of osteogenic cells.

41

42

## 43 **Importance**

44           Although studies have shown association of bone pathology and CHIKV  
45 infection, the pathogenesis of infection causing altered bone homeostasis is not fully  
46 understood. Here, we demonstrate for the first time that BMMSCs are susceptible to  
47 CHIKV infection.     Furthermore, we observe that infection causes disruption in the  
48 function of BMMSC- derived osteogenic cells. Impaired function of these osteogenic  
49 cells will likely lead to a disruption in bone homeostasis and in part, provides a  
50 mechanism for the observed bone pathology associated with CHIKV pathogenesis.

## 51 **Keywords**

52 Chikungunya virus, mesenchymal stem cells, osteogenic differentiation

53

54

55

56

57

58

59

60

61

62

63

## 64 **Introduction**

65 Chikungunya virus (CHIKV) is a positive-sense, single-stranded RNA virus  
66 belonging to the *Togaviridae* family and alphavirus genus (1) (2). Since the mid-1900s,  
67 there have been outbreaks of CHIKV infection in Africa, Asia, and the Indian and Pacific  
68 Ocean region, with few reported cases within Europe (3). Beginning in 2013, there have  
69 been increasing numbers of infections in the Americas, in part due to travel from  
70 affected region (4). CHIKV is transmitted by *Aedes* species (sp). Mosquitoes. CHIKV  
71 infection in the tropical and subtropical regions of the world can lead to Chikungunya  
72 fever (CHIKF) (5). CHIKF is characterized by a self-limiting acute stage, with symptoms  
73 of fever, rash and arthralgia which lasts for 1-2 weeks (6). In 30-40% of cases, infected  
74 individuals develop an incapacitating chronic arthritic stage which may persist for  
75 months to years, thereby imposing a burden on the population in terms of disability  
76 adjusted life years (DALY) (7-10)

77 Recent studies identified bone lesions in the joints of CHIKV infected mice,  
78 indicating that CHIKV can cause bone pathologies (11, 12). In another study, mice  
79 infected with a similar arthritogenic alphavirus, Ross River virus (RRV) resulted in  
80 significant bone loss. (13). In humans, magnetic resonance imaging (MRI) studies  
81 revealed that CHIKV infection is associated with erosive arthritis (14, 15). Taken  
82 together, these studies suggest alphavirus infection can affect bone homeostasis and  
83 thus contribute to arthritic-like conditions.

84 Mesenchymal stem cells (MSCs) are multipotent, non-hematopoietic stromal  
85 cells which can self-renew and differentiate into various cell lineages (16). MSCs can be  
86 derived from umbilical cord blood, adipose tissue and bone marrow (16). Bone marrow-

87 derived MSCs (BMMSCs) have trilineage differentiation potential and they can  
88 differentiate into osteogenic, chondrogenic or adipogenic cell lineage (17). The  
89 osteogenic differentiation of BMMSCs is important for bone-remodeling, and the inability  
90 of BMMSCs to differentiate into the osteogenic lineage may lead to an imbalance in  
91 bone remodeling and eventually bone loss (18-20). A few studies have shown that virus  
92 infection of BMMSCs can affect the properties and function of these cells (21, 22).

93 In this study, we investigated the susceptibility and response of BMMSCs to  
94 CHIKV infection. We hypothesized that CHIKV can infect BMMSCs and affect the  
95 osteogenic differentiation of BMMSCs. Our results show that CHIKV can productively  
96 infect BMMSCs. Importantly, we observed that viral infection significantly impaired the  
97 function of the osteogenic cells, as evidenced by the decrease in alkaline phosphatase  
98 (ALP) activity at 14 days post infection (dpi) and rate of mineralization at 7 and 14 dpi  
99 compared to mock-infected control. Together, these findings indicate CHIKV can infect  
100 BMMSCs and disrupt BMMSC-derived osteogenic cell function.

101

## 102 **Results**

### 103 **BMMSCs are permissive to CHIKV infection**

104 CHIKV infection has been associated with bone pathology, implying its role in  
105 disruption of bone homeostasis (11, 12, 14, 15). BMMSC-derived osteogenic  
106 differentiation is essential for bone homeostasis (18-20). Recent studies show that viral  
107 infection can affect the function of BMMSCs and BMMSC-derived osteogenic cells (21,  
108 22). However, to date, it is unknown whether alphaviruses can infect BMMSCs and  
109 disrupt osteogenic cell function. Permissivity of BMMSCs to CHIKV infection was

110 determined by infecting cells under acute infection condition (Fig.1). To detect the  
111 presence of infection in BMMSCs, immunofluorescence assays (IFA) were performed  
112 at 24 hours post-infection (hpi). Infection was confirmed by visualizing the presence of  
113 viral non-structural protein 4 (nsP4) in infected cells at all MOIs tested (Fig. 2A). To  
114 detect replication of virus in infected cells, the expression of viral non-structural protein 1  
115 (nsP1) gene was quantified by qRT-PCR. Infected cells showed a significant increase in  
116 nsP1 gene expression at 24 hpi with increased MOIs (Fig. 2B). Morphological analysis  
117 of infected cultures at 48 hpi showed the presence of cytopathic effect (CPE),  
118 particularly at higher MOIs (Fig. S1A). CPE was quantified at 48 hpi using  
119 Viral ToxGlo assay by determining ATP content. Higher MOIs (0.1 and 1.0) resulted in  
120 significant CPE as evidenced by the decrease in luminescence signal (Fig. S1B). Lower  
121 MOIs (0.001 and 0.01) resulted in productive viral infection as evidenced by IFA and  
122 qRT-PCR with minimal CPE. Collectively, these data indicate that BMMSCs are  
123 susceptible to CHIKV infection.

124

## 125 **CHIKV infection interferes with function of osteogenic cells**

### 126 **BMMSC-derived osteogenic cells are susceptible to CHIKV infection**

127 Osteogenic differentiation of BMMSCs plays an important role in bone  
128 homeostasis (18-20). In addition, viral infection have been associated with altered  
129 function of BMMSC-derived osteogenic cells (21). Therefore, we next investigated the  
130 fate of CHIKV-infected, differentiated BMMSCs. Based on our initial data we selected a  
131 MOI of 0.001 and 0.01 for further “chronic infection” experiments. Cells were infected  
132 and differentiated as described in Figure 1. Osteogenic differentiation was confirmed by

133 Alizarin Red staining assay. This assay detects the deposition of calcium phosphate  
134 crystals, formed during matrix mineralization by osteogenic cells (23). Presence of red  
135 stained calcium nodes was clearly detected in differentiated cells at 7 and 14 days post  
136 differentiation (dpd) compared to undifferentiated controls (Fig 3). To determine the  
137 susceptibility of the osteogenic cells to CHIKV infection, viral replication was confirmed  
138 by nsP1 gene expression using qRT-PCR at 7 dpi. A significant increase in nsP1  
139 expression was observed in infected cells compared to mock (Fig. 3B). Next, we  
140 confirmed the production of infectious virus particles at 7 dpi by plaque assay (Fig. 3C).  
141 Similarly, we observed an increase in infectious virus particle production. We next  
142 determined the viability of the osteogenic cells during infection. Brightfield images of  
143 infected cells at 7 dpi showed evidence of CPE, particularly at MOI 0.01 (Fig. 3D).  
144 Interestingly, CPE quantification done by Viral ToxGlo assay resulted in minimal CPE  
145 production when compared to mock-infected cells at 7 dpi (Fig. S2A). Morphological  
146 analysis and CPE quantification at 14 dpi showed similar results (Fig. S2B and C).  
147 Taken together, these results demonstrate that osteogenic cells are susceptible to  
148 CHIKV infection and results in minimal CPE at low MOIs.

#### 149 **CHIKV infection impairs function of osteogenic cells**

150 Prior studies have shown viral infection of osteogenic cells causes impaired ALP  
151 activity during differentiation (21). To examine the effect of CHIKV infection on ALP  
152 activity, BMMSCs were infected as previously outlined (Fig 1). ALP activity and ALP  
153 staining assays were performed. No significant change in ALP activity was observed in  
154 infected cells at 7 dpi (Fig. 4A). However, a significant reduction in the ALP activity was  
155 observed in infected cells at 14 dpi (Fig. 4B). The infected cells resulted in reduced ALP

156 staining intensity at both 7 and 14 dpi (Fig. 4C). Next we performed Alizarin Red  
157 staining assay to detect the effect of viral infection on deposition of calcium phosphate  
158 crystals. BMMSC were infected as described in Figure. 1 and Alizarin Red staining  
159 assay was done at 7 and 14 dpi. A significant decrease in calcium phosphate deposits  
160 was observed in infected cells at 7 and 14 dpi (Fig. 4D). Together, these results  
161 demonstrate for the first time that CHIKV infection impairs the function of BMMSC-  
162 derived osteogenic cells.

## 163 **Discussion**

164 Joint pathology and arthritic-like conditions are associated with CHIKV infection,  
165 however the mechanism underlying these conditions remains poorly defined (11, 12, 14,  
166 15, 24). BMMSCs are non-hematopoietic multipotent stem cells which can differentiate  
167 into adipogenic, osteogenic, and chondrogenic lineages (16, 17). These cells can  
168 secrete and respond to different signaling molecules and undergo osteogenic  
169 differentiation thereby playing an essential role in bone homeostasis (18, 25). Previous  
170 studies have shown that virus infection can affect functions of BMMSCs (21, 22, 26), but  
171 it is unclear whether BMMSCs are susceptible to alphavirus infection.

172 Osteogenic cells will terminally differentiate into osteoblasts (18, 23). A prior  
173 report demonstrated that osteoblasts are susceptible to CHIKV infection (27). However,  
174 it is unclear whether osteoblast progenitor cells are susceptible to infection. Moreover,  
175 whether infection affects differentiation and/or function. The results of our study  
176 demonstrate that both BMMSCs and BMMSC-derived osteogenic cells are susceptible  
177 to CHIKV infection. Prior studies have shown that viral infection of BMMSCs can alter  
178 function, therefore we hypothesize that ability of CHIKV to infect these cells will similarly



179 affect function (22). In our preliminary experiments, we observed CPE during infection  
180 of both BMSCs and osteogenic cells at relatively high MOI. However, minimal CPE  
181 was observed at low MOI. We therefore selected lower MOI infections for our chronic  
182 infection experiments.

183 Previous studies demonstrated that viral infection causes impaired matrix  
184 mineralization and ALP activity (21, 22). Our study revealed that despite a lack of  
185 significant change in ALP activity at 7 dpi, there was a significant reduction in ALP  
186 activity at 14 dpi. Moreover, reduction in ALP staining intensity was observed at both 7  
187 and 14 dpi. The results obtained are similar to a prior study showing the effect of viral  
188 infection on ALP activity (21). The lack of significant change in ALP activity at 7 dpi was  
189 likely due the observed absence of a difference in ALP activity between undifferentiated  
190 and differentiated osteogenic cells at 7 dpi (data shown).  
191 Calcium phosphate deposition due to mineralization is a hallmark of osteogenic  
192 differentiation (23, 28). We found that at 7 and 14 dpi, CHIKV caused a significant  
193 reduction in calcium phosphate deposition in infected cells. This indicates that CHIKV  
194 infection disrupts the mineralization function of osteogenic cells, in that way likely  
195 disrupts bone homeostasis. It is important to note that matrix mineralization is also  
196 associated with the production of extracellular matrix (ECM) proteins including  
197 fibronectin, vitronectin, laminin, osteopontin, and osteonectin (23, 28-30). Thus, future  
198 studies will be aimed at examining the expression and production of these proteins in  
199 the context of viral infection.

200 *In vivo* differentiation of BMSCs into the osteogenic cell lineage depends  
201 on their interaction with other cells in the joint space (23, 31-33). Hence, co-culturing of

202 BMMSCs with cells, including osteoclasts, synovial fibroblasts, macrophages and  
203 chondrocytes in the presence of CHIKV will lead to a better understanding the  
204 mechanism underlying the disruption of bone homeostasis (34-36).

205 It is well established that the receptor activator of nuclear factor kappa-B ligand  
206 (RANKL)/osteoprotegerin (OPG) ratio plays an important role in bone homeostasis and  
207 drives osteoclastogenesis (37-40), the dysregulation of which likely contributes to  
208 CHIKV-induced bone pathology. It has been reported that CHIKV infection of  
209 osteoblasts can alter RANKL/OPG ratio (41). Based on our findings, it will be interesting  
210 to examine the contribution of CHIKV infection of osteoblast progenitors *in vitro* and *in*  
211 *vivo* and the effect on RANKL/OPG levels.

212 In our study, we report that BMMSCs are susceptible to CHIKV infection, and  
213 infection impairs ALP activity and calcium phosphate deposition in osteogenic cells. Our  
214 results indicate that CHIKV infection leads to functionally altered osteogenic cells and  
215 likely leads to dysregulation in bone homeostasis. Thus, studying BMMSCs in the  
216 context of CHIKV infection can serve as an appropriate model for better understanding  
217 viral-induced bone pathology.

218

## 219 **Materials and Methods**

### 220 **Cell culture, Compounds and Virus**

221 Human BMMSCs were purchased from Roosterbio (USA). CHIKV (181/25 clone)  
222 was purchased from BEI Resources (USA).

223 BMMSCs were infected at MOI 0.001, 0.01, 0.1 or 1 and incubated for 1 h at  
224 37°C, 5% CO<sub>2</sub>. At one-hour post infection (hpi), cells were washed with DPBS (Corning,

225 USA), replenished with Rooster Basal MSC (RBM) media (RoosterBio, USA) and  
226 incubated at 37°C, 5% CO<sub>2</sub> for 2 days for proliferation. For the purposes of this study,  
227 the 2-day incubation period was considered an acute infection (Fig. 1).

228 For differentiation study, BMMSCs were infected at MOI 0.001 or 0.01 and  
229 incubated for 1 h at 37°C, 5% CO<sub>2</sub>. After 1 hpi, cells were washed with DPBS,  
230 replenished with osteogenic differentiation media containing mesenchymal stem cell  
231 expansion medium (Millipore, USA) and supplemented with 10 mM beta  
232 glycerophosphate (Sigma, USA), 0.1 µM dexamethasone (Sigma, USA) and 200 µM  
233 ascorbic acid (Sigma, USA). Media change was done every 2 dpi. For this study, this  
234 was considered as a chronic infection (Fig. 1). For these experiments, mock-infected  
235 undifferentiated cells were negative controls, while mock-infected differentiated cells  
236 were positive controls.

237 Baby hamster kidney cells (BHK-21; ATCC CCL10) were cultured in Dulbecco's  
238 modified Eagle's medium (DMEM) (Invitrogen, USA) and supplemented with 10% Fetal  
239 bovine serum (FBS) (Gibco, USA)

#### 240 **Determination of CPE**

241 Cells at a density of 1×10<sup>5</sup> per well were seeded in 6-well plates and incubated  
242 for 24 h, at 37°C. A confluent monolayer of cells were infected under both acute and  
243 chronic conditions as mentioned above. To determine CPE, infected cells were  
244 observed using the DM1/MC120 bright field microscope (Leica, Germany). Images were  
245 collected every 24 h for acute infection and at 7 and 14 dpi for chronic infection.

246 The viral CPE was quantified by the Viral ToxGlo assay (Promega, USA). This  
247 assay detects the amount of ATP produced by the cells (42). CPE produced due to viral

248 infection leads to decreased ATP production which can be quantified. Cells at a density  
249 of  $3 \times 10^3$  per well were seeded in a 96-well plate and incubated for 24 h at 37°C. For  
250 quantification of CPE in acute infection, Viral Tox Glo assay was performed at 48 hpi,  
251 and for chronic infection, the assay was performed at 7 and 14 dpi, according to  
252 manufacturer's instructions. The change in ATP production in infected versus mock-  
253 infected BMMSCs was measured using a Tecan Spark® microplate luminometer  
254 (Tecan Trading AG, Switzerland).

### 255 **Immunofluorescence assay**

256 Cells at a density of  $2.5 \times 10^4$  per well were seeded in 4-well plate containing  
257 glass cover slips in each well and incubated for 24 h, at 37 °C. Mock or virus-infected  
258 cells were fixed in 4% paraformaldehyde (PFA) (Electron Microscopy Sciences, USA)  
259 for 30 min and permeabilized with 0.1% Triton X (Fisher Bioreagents, USA) for 10 mins.  
260 Blocking was done in 3% Bovine Serum Albumin-Phosphate Buffered Saline  
261 (PBS/BSA) for 1 h. Virus was stained with antibody against CHIKV non-structural  
262 protein (nsP4) (kindly provided by Dr. Andres Merits). BMMSCs were stained with  
263 mouse anti-Vimentin antibody (V9) (Life Technologies, USA). Following overnight  
264 incubation with primary antibody at 4°C, the cells were stained with Alexa-Fluor 568  
265 goat anti-rabbit IgG and Alexa Fluor 488 donkey anti-mouse IgG (Life Technologies,  
266 USA) for 1 h at room temperature. Nuclear staining was done with Hoechst 33642  
267 (Invitrogen, USA) for 30 min. Images were taken and processed using Zeiss LSM 800  
268 with Airyscan (Germany).

### 269 **ALP activity and ALP staining assay**

270 ALP enzyme activity was determined by ALP activity assay (43). Cells at a  
271 density of  $2.5 \times 10^4$  per well were seeded in a 24-well plate and incubated for 24 h at  
272  $37^\circ\text{C}$ . Cells were then infected as aforementioned. At 7 and 14 dpi, the infected cells  
273 were lysed by freeze-thaw method in a buffer containing Triton X-100 (0.1% v/v)  
274 (Fischer Scientific, USA), 1 mM  $\text{MgCl}_2$  (Alfa Aesar, USA), 20 mM Tris (Fischer  
275 Scientific, USA). The cell lysate was used to perform ALP activity assays using the ALP  
276 activity kit (Sigma-Aldrich, USA) according to the manufacturer's instructions. The ALP  
277 activity assay uses p-nitrophenyl phosphate (pNPP) as substrate which is  
278 dephosphorylated by the ALP enzyme forming p-nitrophenol which was measured  
279 spectrophotometrically at 405 nm in Synergy H1 Hybrid Reader (BioTek, USA)  
280 (43). The total protein content in the infected cells was determined using a BCA protein  
281 assay kit (Thermo Scientific, USA) with bovine serum albumin as a standard. The ALP  
282 activity was expressed as micromole of p-nitrophenol formed per 30 minutes per  
283 microgram of total protein ( $\mu\text{mol}$  per 30 min per  $\mu\text{g}$  protein).

284 Extracellular ALP expression was examined by ALP staining assay (44). Cells at  
285 a density of  $3 \times 10^4$  per well were seeded in a 24-well plate and incubated for 24 h at  
286  $37^\circ\text{C}$ . At 7 and 14 dpi, ALP staining was performed using ALP leukocyte kit (Sigma-  
287 Aldrich, USA) according to manufacturer's instructions. Images were taken using a  
288 DM1/MC120 microscope (Leica, Germany) at 20x magnification.

### 289 **Alizarin Red staining**

290 Cells at a density of  $5 \times 10^4$  per well were seeded in a 24-well plate and incubated  
291 for 24 h at  $37^\circ\text{C}$ . At 7 and 14 dpi, Alizarin Red staining assay was performed using  
292 Alizarin Red solution (EMD Millipore, Germany) according to manufacturer's

293 instructions. Alizarin Red stains the calcium phosphate deposits formed by matrix  
294 mineralization during osteogenic differentiation (23). All images were taken  
295 using DM1/MC120 microscope (Leica, Germany) at 20× magnification.

### 296 **Quantitative RT-PCR (qRT-PCR)**

297 Cells at a density of  $1 \times 10^5$  per well were seeded in a 6-well plate and incubated  
298 for 24 h at 37°C. For acute and chronic infection, cells were collected at 24 hpi and 7  
299 dpi respectively, and lysed in RLT buffer (Qiagen, Germany) for RNA isolation. RNA  
300 isolation was performed using RNeasy Mini kit (Qiagen, Germany) according to the  
301 manufacturer's instructions. RNA was quantified and total RNA was reverse transcribed  
302 using a qScript cDNA synthesis kit (Quantabio, USA) according to the manufacturer's  
303 instructions. SYBR Green Real-Time PCR was performed on a StepOnePlus Real-Time  
304 PCR System (Thermo Scientific, USA) using SSO Advanced SYBR  
305 Green Supermix (Bio-Rad, USA) and primer for the nsP1 gene (Applied Biosystems,  
306 USA) (5'-GGGCTATTCTCTAAACCGTTGGT-3' and 5'-  
307 CTCCCGGCCTATTATCCCAAT-3') according to the manufacturer's instructions with  
308 the following conditions: (i) PCR initial activation step, 95°C for 3 min, 1 cycle, and (ii)  
309 three-step cycling, 95°C for 15s, followed by 60°C for 1min and 95°C for 15s, 40  
310 cycles. The fold change in mRNA expression relative to mock-infected samples was  
311 calculated using the  $2^{-\Delta\Delta C_t}$  method. Transcript levels were normalized using  
312 Hypoxanthine phosphoribosyltransferase 1 (HPRT1) (Hs02800695\_m1) (Thermo  
313 Scientific, USA)

### 314 **Plaque assay**

315 BMMSCs at a density of  $1 \times 10^5$  per well were seeded in a 6-well plate and  
316 incubated for 24 h, at 37°C. The cell culture supernatants were collected from infected  
317 and mock-infected cells at 7dpi and after serial dilution, were used to perform plaque  
318 assay. BHK21 cells were seeded into 24-well plates at a density of  $1 \times 10^5$  cells per well  
319 and cultured to confluence. Confluent layer of BHK21 cells were infected in triplicate  
320 with each dilution of the culture supernatant of infected BMMSCs and incubated for  
321 1 h and 15 min at 37°C, 5% CO<sub>2</sub>. Cells were then overlaid with DMEM containing 5%  
322 FBS and 0.6% agarose (Fischer scientific, USA) and incubated at 37°C for 48 h. After  
323 48 h, the agarose plugs were removed, and the cells were fixed and stained with 0.1%  
324 crystal violet solution containing 3.2% PFA. The plaques were counted, and the viral  
325 titers were expressed as plaque forming units/mL (PFU/mL).

### 326 **Statistical analysis**

327 All statistical analyses were performed using GraphPad Prism 8. Data were represented  
328 as the mean  $\pm$  standard error of the mean (SEM). Significant differences between the  
329 experimental groups were determined using Student's t test. P values  $< 0.001$  were  
330 considered significant.

### 331 **Acknowledgments**

332 We thank Dr. Leah Cook for critical reading of the manuscript and valuable  
333 suggestions. We thank Janice A. Taylor and James R. Talaska of the Advanced  
334 Microscopy Core Facility at the University of Nebraska Medical Center for providing  
335 assistance with confocal microscopy. We also thank Dr. Andres Merits for kindly  
336 providing the nsP4 antibody. This study was supported by NIH/NIAID 1R21AI140026-  
337 01 (SPR & BD) and start-up funds (SPR).  
338

339

## 340 References

- 341 1. Higashi N MA, Tabata K, Nagatomo Y. Electron microscope study of development of  
342 Chikungunya virus in green monkey kidney stable (VERO) cells. *Virology*. 1967;33(1):55-69.
- 343 2. Morrison CR, Plante KS, Heise MT. Chikungunya Virus: Current Perspectives on a  
344 Reemerging Virus. *Microbiol Spectr*. 2016;4(3).
- 345 3. Zeller H, Van Bortel W, Sudre B. Chikungunya: Its History in Africa and Asia and Its  
346 Spread to New Regions in 2013-2014. *J Infect Dis*. 2016;214(suppl 5):S436-S40.
- 347 4. Yactayo S, Staples JE, Millot V, Cibrelus L, Ramon-Pardo P. Epidemiology of Chikungunya  
348 in the Americas. *J Infect Dis*. 2016;214(suppl 5):S441-S5.
- 349 5. Powers AM, Logue CH. Changing patterns of chikungunya virus: re-emergence of a  
350 zoonotic arbovirus. *J Gen Virol*. 2007;88(Pt 9):2363-77.
- 351 6. Cunha RVD, Trinta KS. Chikungunya virus: clinical aspects and treatment - A Review.  
352 *Mem Inst Oswaldo Cruz*. 2017;112(8):523-31.
- 353 7. Chang AY, Encinales L, Porras A, Pacheco N, Reid SP, Martins KAO, et al. Frequency of  
354 Chronic Joint Pain Following Chikungunya Virus Infection: A Colombian Cohort Study. *Arthritis*  
355 *Rheumatol*. 2018;70(4):578-84.
- 356 8. Amaral JK, Taylor PC, Teixeira MM, Morrison TET, Schoen RT. The Clinical Features,  
357 Pathogenesis and Methotrexate Therapy of Chronic Chikungunya Arthritis. *Viruses*. 2019;11(3).
- 358 9. Sales G, Barbosa ICP, Canejo Neta LMS, Melo PL, Leitao RA, Melo HMA. Treatment of  
359 chikungunya chronic arthritis: A systematic review. *Rev Assoc Med Bras (1992)*. 2018;64(1):63-  
360 70.
- 361 10. K. Krishnamoorthy KTH, A. Krishna Kumari & L.K. Das. Burden of chikungunya in India:  
362 estimates of disability adjusted life years (DALY) lost in 2006 epidemic  
363 *J Vector Borne Dis*. 2009;46(1):26-35.
- 364 11. Goupil BA, McNulty MA, Martin MJ, McCracken MK, Christofferson RC, Mores CN. Novel  
365 Lesions of Bones and Joints Associated with Chikungunya Virus Infection in Two Mouse Models  
366 of Disease: New Insights into Disease Pathogenesis. *PLoS One*. 2016;11(5):e0155243.
- 367 12. Gardner J, Anraku I, Le TT, Larcher T, Major L, Roques P, et al. Chikungunya virus arthritis  
368 in adult wild-type mice. *J Virol*. 2010;84(16):8021-32.
- 369 13. Chen W, Foo SS, Rulli NE, Taylor A, Sheng KC, Herrero LJ, et al. Arthritogenic alphaviral  
370 infection perturbs osteoblast function and triggers pathologic bone loss. *Proc Natl Acad Sci U S*  
371 *A*. 2014;111(16):6040-5.
- 372 14. Manimunda SP, Vijayachari P, Uppoor R, Sugunan AP, Singh SS, Rai SK, et al. Clinical  
373 progression of chikungunya fever during acute and chronic arthritic stages and the changes in  
374 joint morphology as revealed by imaging. *Trans R Soc Trop Med Hyg*. 2010;104(6):392-9.
- 375 15. Malvy D, Ezzedine K, Mamani-Matsuda M, Autran B, Tolou H, Receveur MC, et al.  
376 Destructive arthritis in a patient with chikungunya virus infection with persistent specific IgM  
377 antibodies. *BMC Infect Dis*. 2009;9:200.
- 378 16. Wei X, Yang X, Han ZP, Qu FF, Shao L, Shi YF. Mesenchymal stem cells: a new trend for  
379 cell therapy. *Acta Pharmacol Sin*. 2013;34(6):747-54.



- 380 17. Li M, Ikehara S. Bone-marrow-derived mesenchymal stem cells for organ repair. *Stem*  
381 *Cells Int.* 2013;2013:132642.
- 382 18. Wang C, Meng H, Wang X, Zhao C, Peng J, Wang Y. Differentiation of Bone Marrow  
383 Mesenchymal Stem Cells in Osteoblasts and Adipocytes and its Role in Treatment of  
384 Osteoporosis. *Med Sci Monit.* 2016;22:226-33.
- 385 19. Wagner ER, Luther G, Zhu G, Luo Q, Shi Q, Kim SH, et al. Defective osteogenic  
386 differentiation in the development of osteosarcoma. *Sarcoma.* 2011;2011:325238.
- 387 20. Valenti MT, Dalle Carbonare L, Mottes M. Osteogenic Differentiation in Healthy and  
388 Pathological Conditions. *Int J Mol Sci.* 2016;18(1).
- 389 21. Mumtaz N, Koedam M, van den Doel PB, van Leeuwen J, Koopmans MPG, van der  
390 Eerden BCJ, et al. Zika virus infection perturbs osteoblast function. *Sci Rep.* 2018;8(1):16975.
- 391 22. Smirnov SV, Harbacheuski R, Lewis-Antes A, Zhu H, Rameshwar P, Kotenko SV. Bone-  
392 marrow-derived mesenchymal stem cells as a target for cytomegalovirus infection: implications  
393 for hematopoiesis, self-renewal and differentiation potential. *Virology.* 2007;360(1):6-16.
- 394 23. Hanna H, Mir LM, Andre FM. In vitro osteoblastic differentiation of mesenchymal stem  
395 cells generates cell layers with distinct properties. *Stem Cell Res Ther.* 2018;9(1):203.
- 396 24. Goupil BA, Mores CN. A Review of Chikungunya Virus-induced Arthralgia: Clinical  
397 Manifestations, Therapeutics, and Pathogenesis. *Open Rheumatol J.* 2016;10:129-40.
- 398 25. Cao J, Wei Y, Lian J, Yang L, Zhang X, Xie J, et al. Notch signaling pathway promotes  
399 osteogenic differentiation of mesenchymal stem cells by enhancing BMP9/Smad signaling. *Int J*  
400 *Mol Med.* 2017;40(2):378-88.
- 401 26. Meisel R, Heseler K, Nau J, Schmidt SK, Leineweber M, Pudelko S, et al. Cytomegalovirus  
402 infection impairs immunosuppressive and antimicrobial effector functions of human  
403 multipotent mesenchymal stromal cells. *Mediators Inflamm.* 2014;2014:898630.
- 404 27. Chalaem P, Chusri S, Fernandez S, Chotigeat W, Anguita J, Pal U, et al. Characterization  
405 of a Chikungunya virus strain isolated from banked patients' sera. *Viol J.* 2016;13(1):150.
- 406 28. Wischmann J, Lenze F, Thiel A, Bookbinder S, Querido W, Schmidt O, et al. Matrix  
407 mineralization controls gene expression in osteoblastic cells. *Exp Cell Res.* 2018;372(1):25-34.
- 408 29. Assis-Ribas T, Forni MF, Winnischofer SMB, Sogayar MC, Trombetta-Lima M.  
409 Extracellular matrix dynamics during mesenchymal stem cells differentiation. *Dev Biol.*  
410 2018;437(2):63-74.
- 411 30. Wang W, Li P, Li W, Jiang J, Cui Y, Li S, et al. Osteopontin activates mesenchymal stem  
412 cells to repair skin wound. *PLoS One.* 2017;12(9):e0185346.
- 413 31. Tsai MT, Lin DJ, Huang S, Lin HT, Chang WH. Osteogenic differentiation is synergistically  
414 influenced by osteoinductive treatment and direct cell-cell contact between murine osteoblasts  
415 and mesenchymal stem cells. *Int Orthop.* 2012;36(1):199-205.
- 416 32. LOUIS C. GERSTENFELD JC, COLLEEN M. SHEA, KUBER SAMPATH, GEORGE L. BARNES,  
417 and THOMAS A. EINHORN. Chondrocytes Provide Morphogenic Signals That Selectively Induce  
418 Osteogenic Differentiation of Mesenchymal Stem Cells. *JOURNAL OF BONE AND MINERAL*  
419 *RESEARCH.* 2002;17(2):221-30.
- 420 33. F. VILLARS BG, T. AME' DE' E, S. DUTOYA, L. BORDENAVE, R. BAREILLE, AND J. AME' DE'  
421 E. Effect of HUVEC on human osteoprogenitor cell differentiation needs heterotypic gap  
422 junction communication. *Am J Physiol Cell Physiol.* 2001;282(4):775-85.

- 423 34. Jeon OH, Panicker LM, Lu Q, Chae JJ, Feldman RA, Elisseeff JH. Human iPSC-derived  
424 osteoblasts and osteoclasts together promote bone regeneration in 3D biomaterials. *Sci Rep.*  
425 2016;6:26761.
- 426 35. Chen Y-J, Shie M-Y, Hung C, Jr., Liu S-L, Huang T-H, Kao C-T. Osteoblasts subjected to  
427 tensile force induce osteoclastic differentiation of murine macrophages in a coculture system.  
428 *Journal of Dental Sciences.* 2015;10(1):81-7.
- 429 36. James Jam Jolly K-YC, Mohd Fozi Nur Farhana, Ekram Alias, Kien Hui Chua, Wan Nuraini  
430 Wan Hasan, Soelaiman Ima-Nirwana,. Optimization of the Static Human Osteoblast/Osteoclast  
431 Co-culture System. 2018;43(2):208-13.
- 432 37. Boyce BF, Xing L. Functions of RANKL/RANK/OPG in bone modeling and remodeling.  
433 *Arch Biochem Biophys.* 2008;473(2):139-46.
- 434 38. Geusens PP, Landewe RB, Garnero P, Chen D, Dunstan CR, Lems WF, et al. The ratio of  
435 circulating osteoprotegerin to RANKL in early rheumatoid arthritis predicts later joint  
436 destruction. *Arthritis Rheum.* 2006;54(6):1772-7.
- 437 39. Geusens P. The role of RANK ligand/osteoprotegerin in rheumatoid arthritis. *Ther Adv*  
438 *Musculoskelet Dis.* 2012;4(4):225-33.
- 439 40. Remuzgo-Martinez S, Genre F, Lopez-Mejias R, Ubilla B, Mijares V, Pina T, et al.  
440 Expression of osteoprotegerin and its ligands, RANKL and TRAIL, in rheumatoid arthritis. *Sci*  
441 *Rep.* 2016;6:29713.
- 442 41. Noret. 2012.
- 443 42. Li YG, Siripanyaphinyo U, Tumkosit U, Noranate N, A An, Tao R, et al. Chikungunya virus  
444 induces a more moderate cytopathic effect in mosquito cells than in mammalian cells.  
445 *Intervirology.* 2013;56(1):6-12.
- 446 43. Kuss MA, Wu S, Wang Y, Untrauer JB, Li W, Lim JY, et al. Prevascularization of 3D printed  
447 bone scaffolds by bioactive hydrogels and cell co-culture. *Journal of Biomedical Materials*  
448 *Research Part B: Applied Biomaterials.* 2018;106(5):1788-98.
- 449 44. Birmingham E, Niebur GL, McHugh PE, Shaw G, Barry FP, McNamara LM. Osteogenic  
450 differentiation of mesenchymal stem cells is regulated by osteocyte and osteoblast cells in a  
451 simplified bone niche. *European Cells and Materials.* 2012;23:13-27.
- 452

## 453 **Figure Legends**

454 Fig 1. Experimental outline.

455

456 Fig 2. CHIKV infects and replicates in BMMSCs. BMMSCs were mock-infected or  
457 infected with CHIKV under acute viral infection: MOIs of 0.001, 0.01, 0.1 or 1.0 (A)  
458 Representative immunofluorescence images of cells fixed and immunostained at 24 hpi  
459 with antibodies against the viral nsP4 protein (red), Vimentin (green), and Hoechst

460 nuclear stain (blue). Scale bar=20 $\mu$ m. (B) Viral nsP1 gene expression was quantified by  
461 qRT-PCR at 24 hpi. Bar graph shows fold change in gene expression. Fold change was  
462 calculated by  $2^{-\Delta\Delta C_t}$  method. Error bars show  $\pm$ SEM.

463  
464 Fig 3. Osteogenic differentiation of BMMSCs and susceptibility of osteogenic cells to  
465 CHIKV infection. (A) Representative brightfield images of mock infected, differentiated  
466 and undifferentiated BMMSCs, stained with Alizarin Red at 7 and 14 dpd. Scale  
467 bar=0.2 $\mu$ m. (B) Viral nsP1 gene expression was quantified by qRT-PCR at 7 dpi. Bar  
468 graph shows fold change in gene expression in infected cells compared to mock-  
469 infected control. Fold change was calculated by  $2^{-\Delta\Delta C_t}$  method. n=3. (C) Plaque  
470 assays were performed using culture supernatant of infected BMMSCs. n=3. Error bars  
471 show  $\pm$ SEM. (D) Representative bright field images of morphological analysis of  
472 BMMSCs at 7 dpi to detect CPE. n=3. Scale bar=0.2  $\mu$ m.

473  
474 Fig 4. Effect of CHIKV infection on osteogenic cells. BMMSCs were mock-infected or  
475 infected with CHIKV under chronic viral infection at MOIs of 0.001 or 0.01. (A and B)  
476 Bar graphs show intracellular ALP activity detected by ALP activity assay at 7 and 14  
477 dpi. ALP levels were normalized against total protein. n=5. Error bars show  $\pm$ SEM.  
478 Significant changes are represented as p-values (\*\*p<0.001) (C) Representative bright  
479 field images of infected and mock infected BMMSCs stained by ALP staining assay to  
480 detect extracellular ALP activity at 7 and 14 dpi. (D) Representative brightfield images of  
481 infected and mock infected BMMSCs, stained with Alizarin Red at 7 and 14 dpi. Scale  
482 bar=0.2  $\mu$ m.

483

484 Fig. S1. CHIKV infection produces CPE in BMMSCs. BMMSCs were infected at MOIs of  
485 0.001, 0.01, 0.1 or 1.0. (A) Representative brightfield images of morphological analysis  
486 of BMMSCs at 48 hpi. Scale bar=0.2  $\mu$ m. (B) Quantification of CPE was performed at  
487 48 hpi using Viral ToxGlo assay. n=3. Error bars show  $\pm$ SEM.

488

489 Fig. S2. CHIKV produces CPE in osteogenic cells. BMMSCs were mock-infected or  
490 infected with CHIKV under chronic viral infection: MOIs of 0.001 or 0.01. (A)  
491 Quantification of CPE was performed at 7 dpi using Viral ToxGlo assay. n=3. Error bars  
492 show  $\pm$ SEM.

493 (B) Representative brightfield images of morphological analysis of BMMSCs at 14 dpi.  
494 Scale bar=0.2  $\mu$ m. (C) Quantification of CPE was performed at 14 dpi using Viral  
495 ToxGlo assay. n=3. Error bars show  $\pm$ SEM.

496

497

498

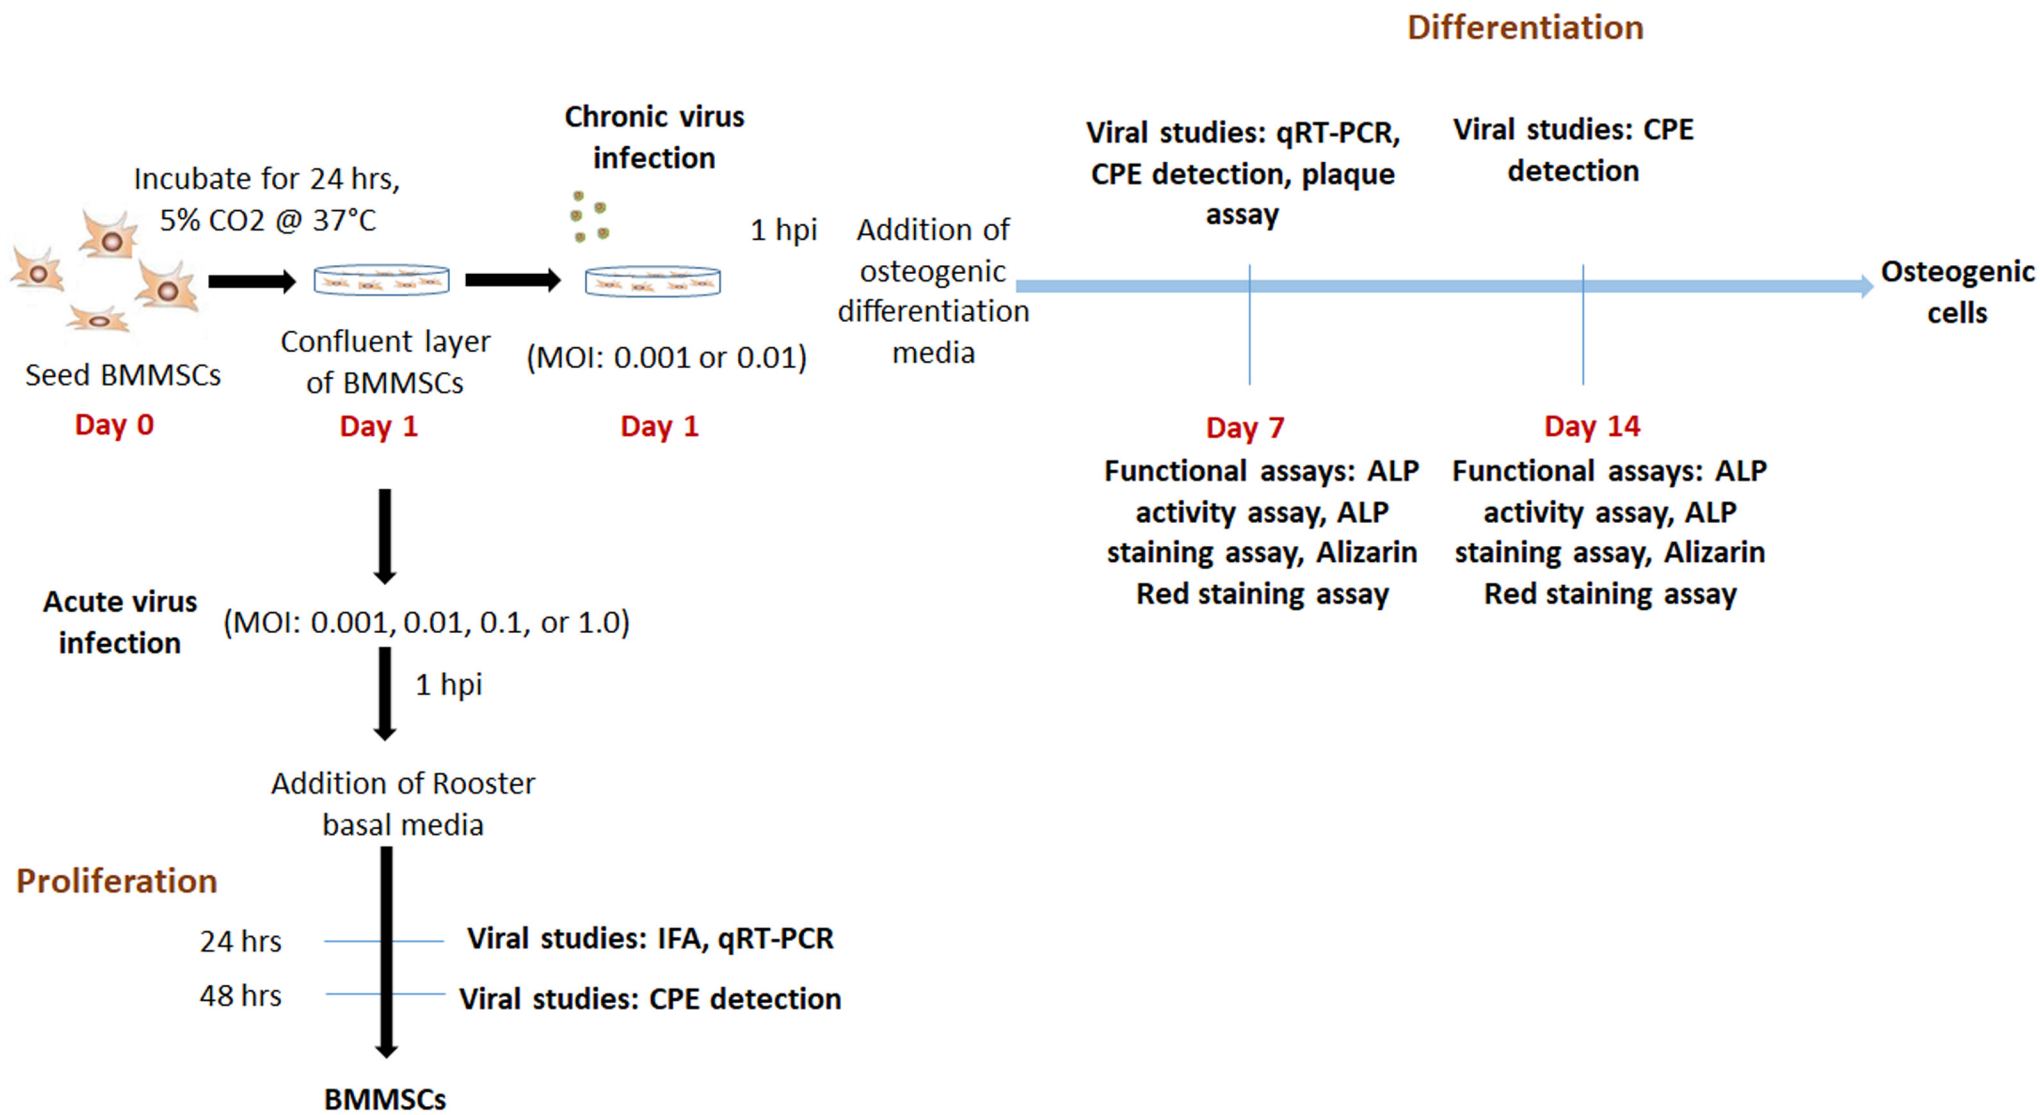

A)

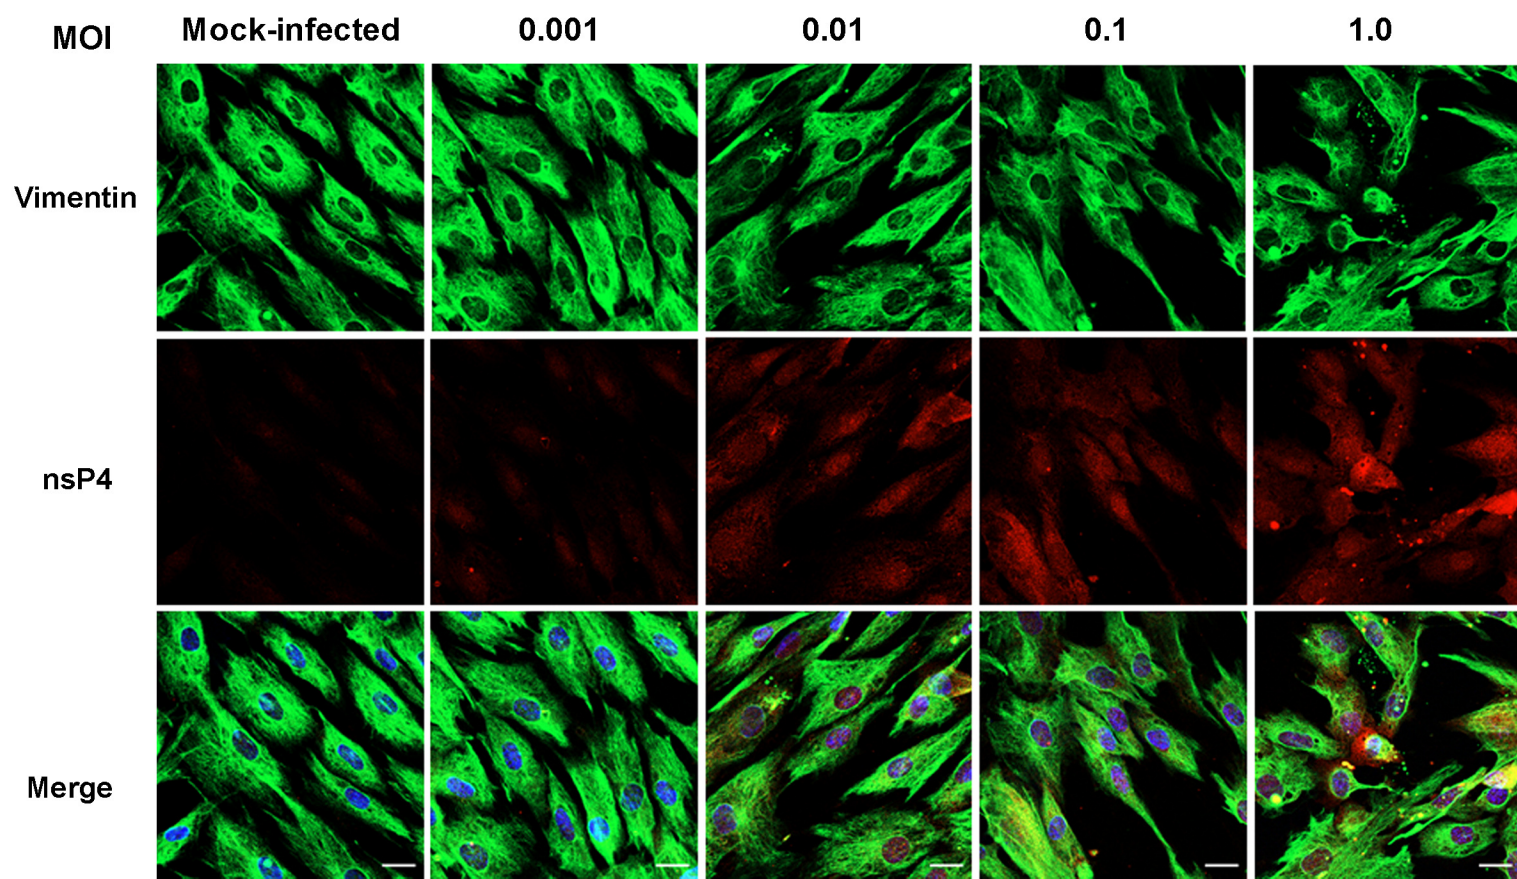

B)

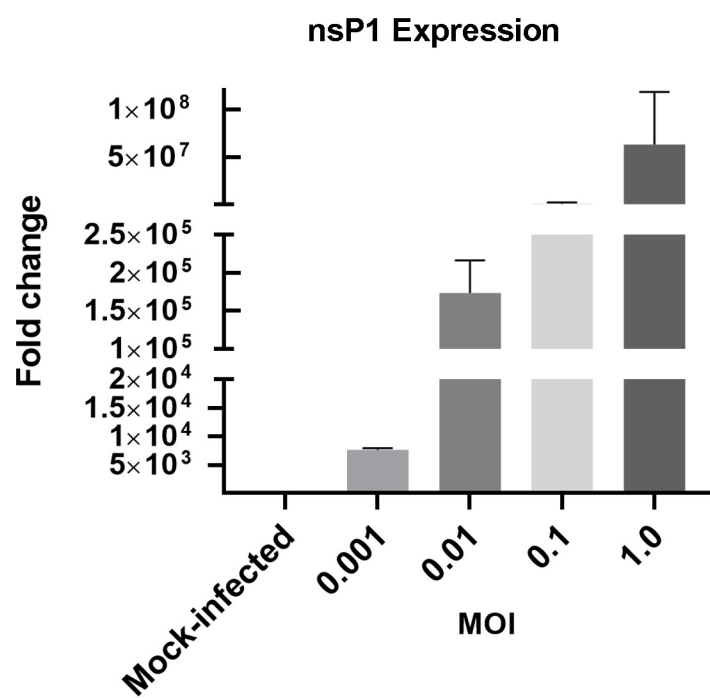

A)

Day 7

Day 14

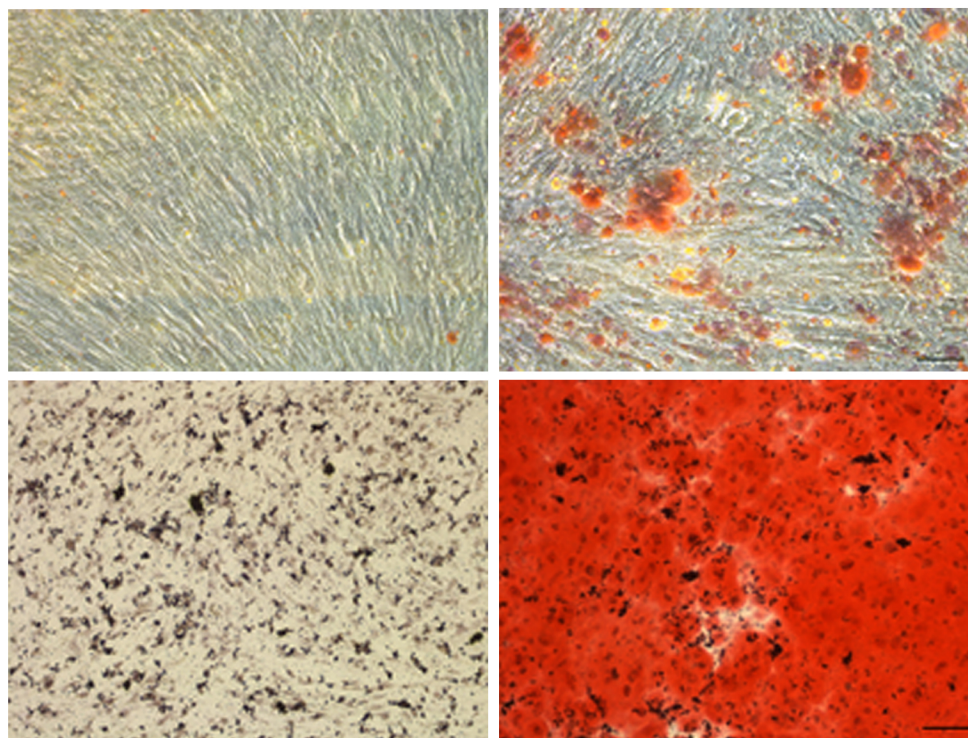

B)

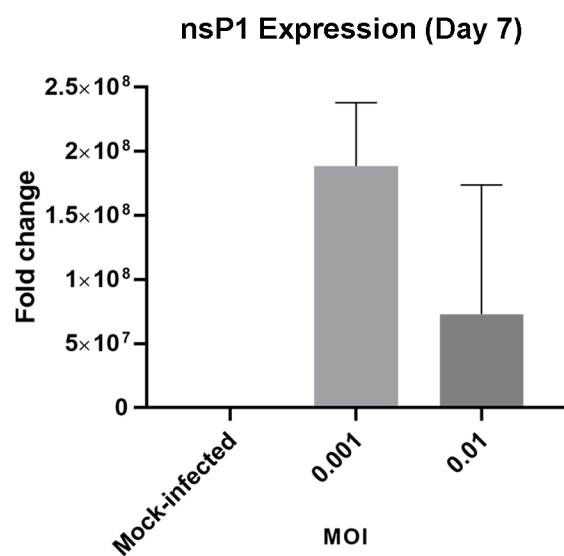

C)

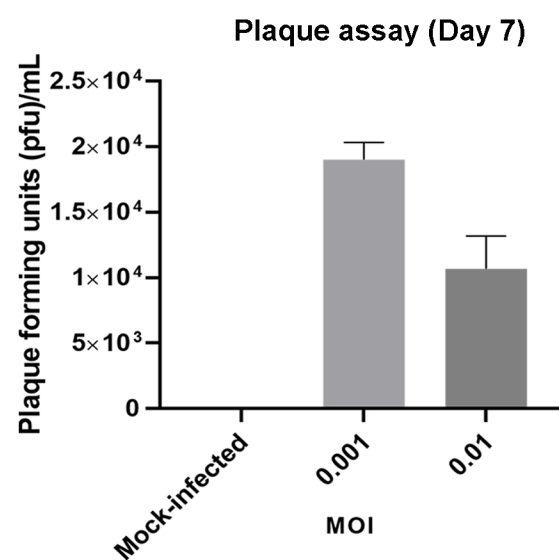

D)

Morphological Analysis (Day 7)

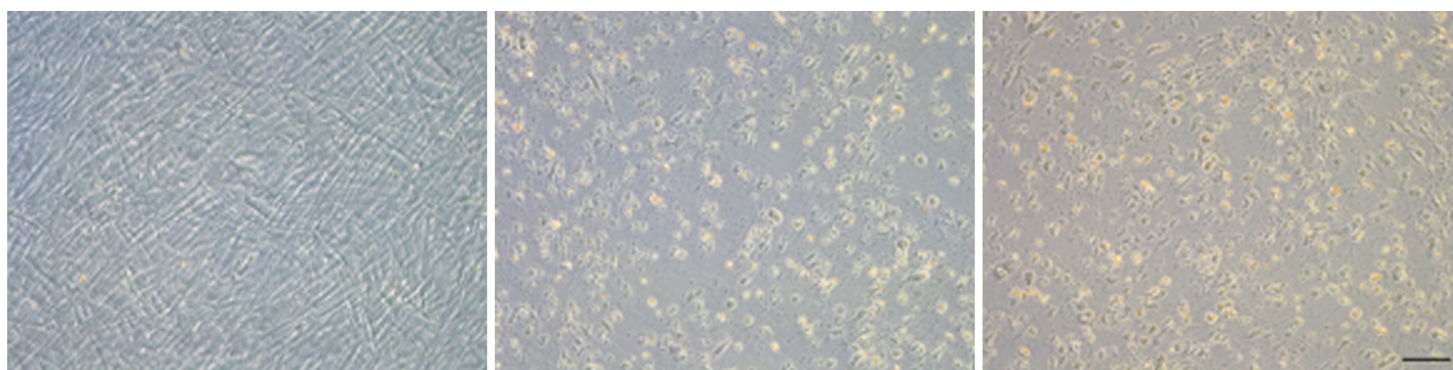

MOI

Mock-infected

0.001

0.01

**A)** ALP activity assay (Day 7)

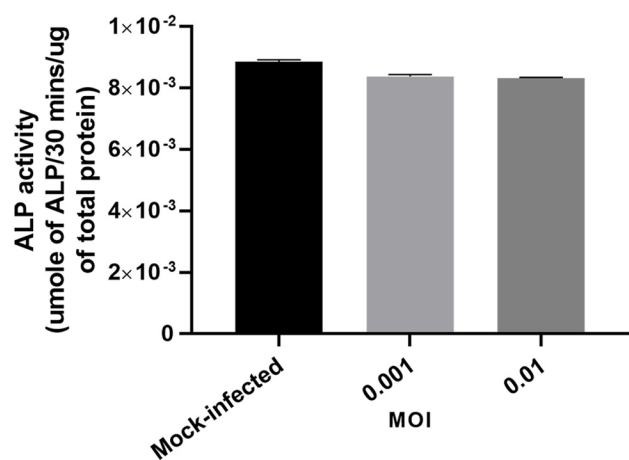

**B)** ALP activity assay (Day 14)

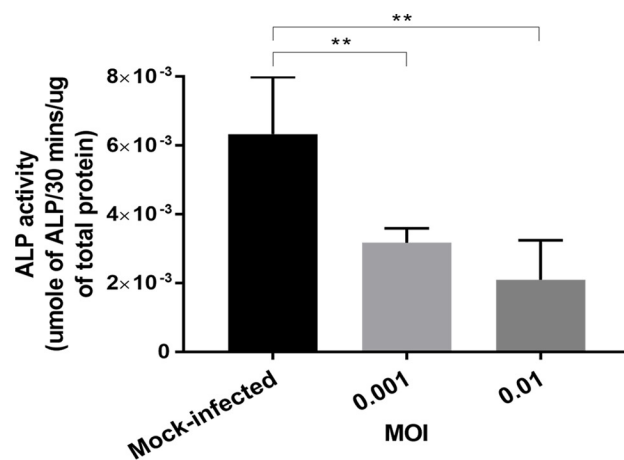

**C)**

ALP Staining assay

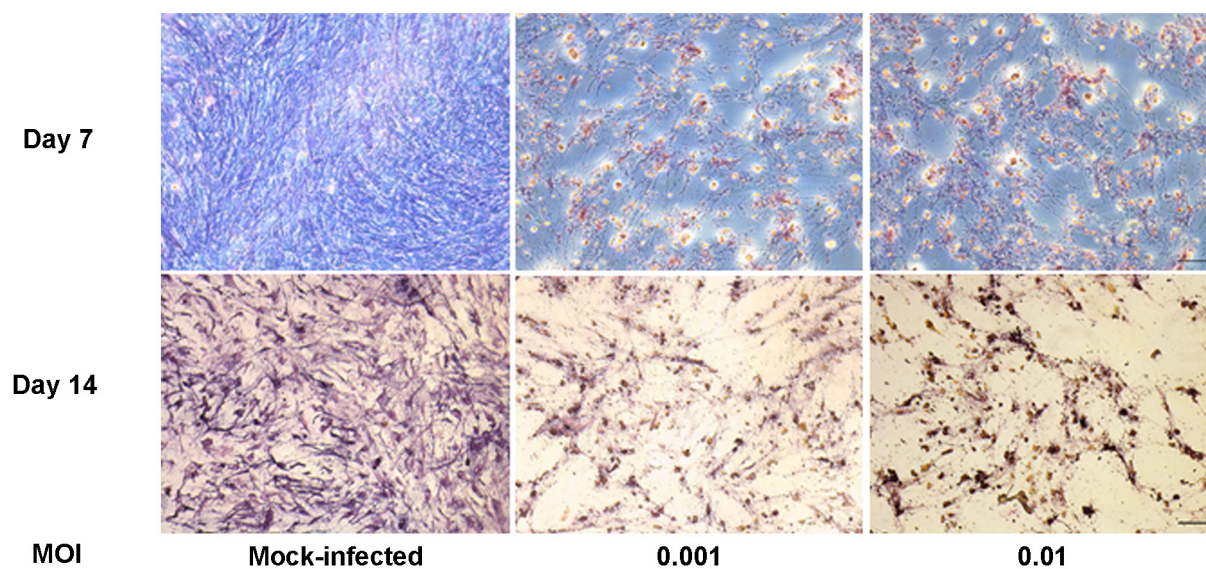

**D)**

Alizarin Red Staining assay

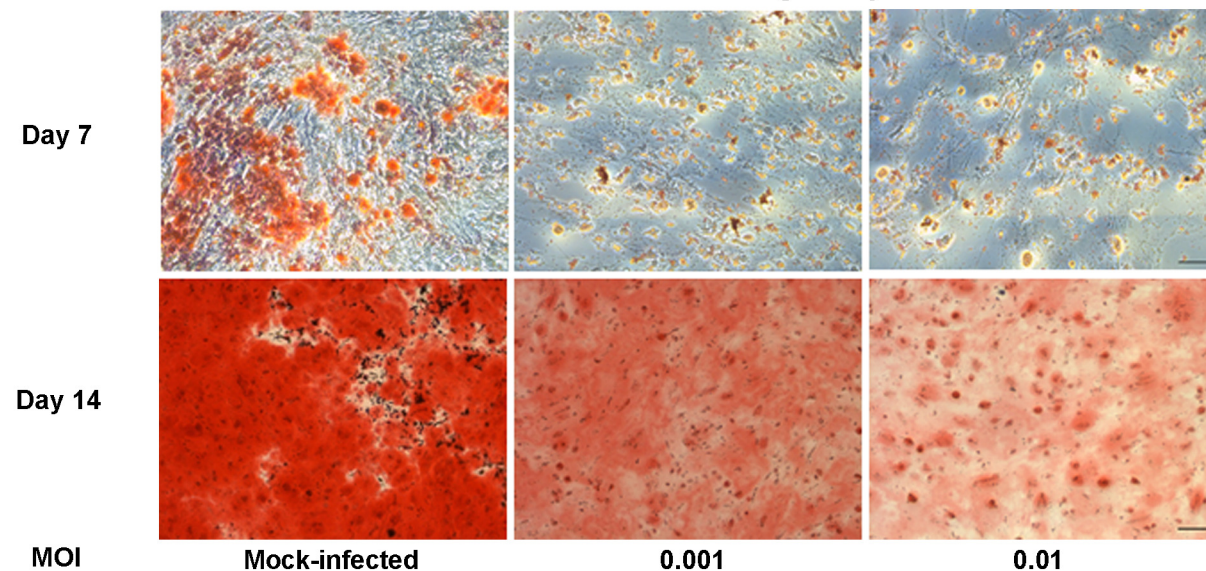

Source: https://www.biorxiv.org/content/10.1101/780791v1.full.pdf
